# Supplementary material for: Drug pricing reform in China: analysis of piloted approaches and potential impact of the reform
Source: PubMed Central journal article supplement (PMC4802695; doi:10.3402/jmahp.v4.30458), 2016-03-15
Supplement: JMAHP-4-30458-s001.pdf [file JMAHP-4-30458-s001.pdf]

1 *Supplementary files*

2 **Table S1. The use of different IRP & ERP policies in selected European countries (15, 16)**

| Example approaches |                                                                                | BE | DE             | DK | NL             | FR |
|--------------------|--------------------------------------------------------------------------------|----|----------------|----|----------------|----|
| <b>IRP</b>         | Active ingredient-based internal reference price groups                        | X  | X              | X  | X              | X  |
|                    | Pharmacological class-based internal reference price groups                    |    | X              |    | X              |    |
|                    | Therapeutic class-based internal reference price groups                        |    | X              |    | X              |    |
|                    | Reference price at the average price of drugs from the group                   |    |                |    |                | X  |
|                    | Reference price at the weighted average price of drugs from the group          |    | X <sup>1</sup> |    | X <sup>2</sup> |    |
|                    | Reference price at the fixed % below the price of the off-patent original drug | X  |                |    |                |    |
|                    | Reference price at the cheapest drug from the group                            |    |                | X  |                |    |
| <b>ERP</b>         | ERP to set or adjust prices of reimbursable drugs outside the IRP system       | X  | X <sup>3</sup> | X  | X              | X  |
|                    | ERP to set or adjust prices of reimbursable drugs inside the IRP system        |    |                |    | X              |    |

3 BE – Belgium, DE – Germany, DK – Denmark, ERP – external reference pricing, IRP – internal reference pricing, NL – the  
 4 Netherlands, FR – France

5 1 – Reference price calculated by regression analysis (econometric model)

6 2 – Reference price set directly below the weighted average price of medicines

7 3 – For new hospital-only medicines

8

China National Knowledge Infrastructure: <http://www.cnki.net>

- Search 1 (SU=('医保支付') OR SU=('药品支付') OR SU=('药品参考价') OR SU=('药品参考定价') OR SU=('药价改革') OR SU=('药品定价改革') OR TI=('医保支付') OR TI=('药品支付') OR TI=('药品参考价') OR TI=('药品参考定价') OR TI=('药价改革') OR TI=('药品定价改革') OR KY=('医保支付') OR KY=('药品支付') OR KY=('药品参考价') OR KY=('药品参考定价') OR KY=('药价改革') OR KY=('药品定价改革') OR AB=('医保支付') OR AB=('药品支付') OR AB=('药品参考价') OR AB=('药品参考定价') OR AB=('药价改革') OR AB=('药品定价改革')) AND (FT=('德国') OR FT=('台湾') OR FT=('日本'))
- Search 2 (SU=('医保支付') OR SU=('药品支付') OR SU=('药品参考价') OR SU=('药品参考定价') OR SU=('药价改革') OR SU=('药品定价改革') OR TI=('医保支付') OR TI=('药品支付') OR TI=('药品参考价') OR TI=('药品参考定价') OR TI=('药价改革') OR TI=('药品定价改革') OR KY=('医保支付') OR KY=('药品支付') OR KY=('药品参考价') OR KY=('药品参考定价') OR KY=('药价改革') OR KY=('药品定价改革') OR AB=('医保支付') OR AB=('药品支付') OR AB=('药品参考价') OR AB=('药品参考定价') OR AB=('药价改革') OR AB=('药品定价改革')) AND (FT=('重庆') OR FT=('绍兴') OR FT=('三明'))
- Search 3 (SU=('医保支付') OR SU=('药品支付') OR SU=('药品参考价') OR SU=('药品参考定价') OR SU=('药价改革') OR SU=('药品定价改革') OR TI=('医保支付') OR TI=('药品支付') OR TI=('药品参考价') OR TI=('药品参考定价') OR TI=('药价改革') OR TI=('药品定价改革') OR KY=('医保支付') OR KY=('药品支付') OR KY=('药品参考价') OR KY=('药品参考定价') OR KY=('药价改革') OR KY=('药品定价改革') OR AB=('医保支付') OR AB=('药品支付') OR AB=('药品参考价') OR AB=('药品参考定价') OR AB=('药价改革') OR AB=('药品定价改革')) AND (TI=('中国') OR AB=('中国'))

Wanfang Data: <http://www.wanfangdata.com.cn>

- Search 1 主题:((医保支付+药品支付+药品参考价+药品参考定价+药价改革+药品定价改革)\*(重庆+三明+绍兴+德国+日本+台湾+中国))+题名或关键词: ((医保支付+药品支付+药品参考价+药品参考定价+药价改革+药品定价改革)\*(重庆+三明+绍兴+德国+日本+台湾+中国))+摘要: ((医保支付+药品支付+药品参考价+药品参考定价+药价改革+药品定价改革)\*(重庆+三明+绍兴+德国+日本+台湾+中国))

Weipu: [www.cgvip.com](http://www.cgvip.com)

- Search 1 (m=(医保支付+药品支付+药品参考价+药品参考定价+药价改革+药品定价改革)+r=(医保支付+药品支付+药品参考价+药品参考定价+药价改革+药品定价改革))\*(m=(重庆+三明+绍兴+德国+日本+台湾+中国)+r=(重庆+三明+绍兴+德国+日本+台湾+中国))

12 **Table S3. Profiles of interviewed key opinion leaders**

| Interviewee | Perspective | Profile                                                                                                                                                         |
|-------------|-------------|-----------------------------------------------------------------------------------------------------------------------------------------------------------------|
| #1          | Authorities | Leading position in the Institute of Social Security, the Ministry of Human Resources and Social Security and the China Health Insurance Research Association   |
| #2          | Authorities | Director of the Office of Urban and Rural Social Insurance Bureau in a mid-size city; initiated various pilot projects regarding drug reimbursement and pricing |
| #3          | Authorities | Chief of the health insurance authority in one piloting city; in charge of the development of reimbursement and procurement lists and drug pricing              |
| #4          | Authorities | Manager of drug procurement authority in one piloting city; participated in the establishment of drug pricing policy in this city                               |
| #5          | Authorities | Leading position in the provincial pricing authority which manages one piloting city; directly involved in drug pricing and related policy making               |
| #6          | Authorities | Academic representative; leading drug pricing related researches and other health policy-related research                                                       |
| #7          | Prescribers | One of the Chinese leading physicians                                                                                                                           |
| #8          | Prescribers | One of the leading physicians in one piloting city                                                                                                              |
| #9          | Prescribers | One of the leading physicians in one piloting city                                                                                                              |

13

14

15 **Table S4. Drugs stopped or limited by the Shaoxing 7<sup>th</sup> People's Hospital (27)**

| Active ingredient; formulation        | Brand name        | Producer                                         | Impact      |
|---------------------------------------|-------------------|--------------------------------------------------|-------------|
| Fluoxetine; capsules                  | Prozac            | Patheon France                                   | Stopped     |
| Fluvoxamine; tablets                  | Luvox             | Abbott Healthcare SAS France                     | Stopped     |
| Lamotrigine; tablet                   | Lamictal          | GSK Phamaceuticals S.A. Poland                   | Stopped     |
| Mirtazapine; tablets                  | Remeron           | N.V. Organon Netherlands                         | Stopped     |
| Paliperidone; ER tablets              | Invega            | Janssen Cilag Manufacturing L.L.C<br>Puerto Rico | Stopped     |
| Tandospirone; capsules                | LvKang            | Keruide Sichuan China                            | Stopped     |
| Ziprasidone; capsules                 | Zeldox            | Pfizer Australia Pty Limited                     | Stopped     |
| Cefoperazone/sulbactam;<br>injections | Sulperazon        | Pfizer                                           | Limited use |
| Duloxetine; capsules                  | Cymbalta          | Eli Lilly and Company USA                        | Limited use |
| Enteral nutrition emulsion            | Fresubin Diabetes | Fresenius Kabi Germany                           | Limited use |
| Enteral nutrition suspension          | 能全力 (Nengquanli)  | Nutricia Phamaceuticals Wuxi China               | Limited use |
| Escitalopram; tablets                 | Lexapro           | H. Lundbeck A/S Denmark                          | Limited use |
| Oxazepam; tablets                     | 优菲 (Youfei)       | Yimin Pharmaceuticals Beijing                    | Limited use |
| Venlafaxine; ER capsules              | Effexor XR        | Wyeth Medica Ireland                             | Limited use |

16 ER – extended release

17 **Table S5. Cities allowed to pilot the “2<sup>nd</sup> price negotiation” (29-31)**

| Area    | First set of participating cities                       | Second set of participating cities                                   | Third set of participating cities                                                                                                                                                                                        |
|---------|---------------------------------------------------------|----------------------------------------------------------------------|--------------------------------------------------------------------------------------------------------------------------------------------------------------------------------------------------------------------------|
| Eastern | Anshan, Shanghai, Zhenjiang, Xiamen, Weifang, Shenzhen, | Tianjin, Shaoxing, Ningbo, Sanming, Zhuhai                           | Benxi, Nanjing, Wuxi, Xuzhou, Changzhou, Suzhou, Nantong, Lianyungang, Huaian, Yancheng, Yangzhou, Taizhou, Hangzhou, Wenzhou, Fuzhou, Putian, Quanzhou, Zhangzhou, Nanping, Longyan, Ningde, Weihai, Dongying, Dongguan |
| Middle  | Qitaihe, Wuhu, Maanshan, Luoyang, Ezhou, Zhuzhou        | Tangshan, Taiyuan, Changchun, Xinyu, Sanya                           | Handan, Yuncheng, Yanbian, Qiqihaer, Hefei, Bengbu, Huainan, Huaibei, Tongling, Anqing, Huangshan, Chuzhou, Fuyang, Suzhou, Liuan, Haozhou, Chizhou, Xuancheng, Yingtan, Jiaozuo, Puyang, Wuhan, Changsha, Danzhou       |
| Western | Zunyi, Kunming, Baoji, xining                           | Chongqing, Nanchong, Qingyang, Yinchuan, Kelamayi, Liuzhou, Eerduosi | Huhehaote, Wuhai, Yulin, Panzhihua, Guangyuan, Guiyang, Yuxi, Yanan, Baiyin, Haidong, Haixi, Hainanzhou, Haibei, Huangnan, Guoluo, Yushu, Wuzhong, Tulufan                                                               |
| Other   | Beijing                                                 | x                                                                    | x                                                                                                                                                                                                                        |

18

19

20 **Table S6. Feedback on international policies from primary research**

| Approach                                                                                                                                                                            | Rating (1, 2, 3) |    |    |    |    |    | Average |
|-------------------------------------------------------------------------------------------------------------------------------------------------------------------------------------|------------------|----|----|----|----|----|---------|
|                                                                                                                                                                                     | P1               | P2 | P3 | P4 | P5 | P6 |         |
| Setting internal reference price groups for drugs with the same active ingredient (i.e. the same INN)                                                                               | 1                | NA | 1  | 1  | 1  | 1  | 1.00    |
| Setting internal reference price groups for drugs with different INNs but belonging to the same pharmacological class                                                               | 3                | 3  | 3  | x  | 3  | 3  | 3.00    |
| Setting internal reference price groups for drugs with different INNs and belonging to different pharmacological classes but with similar therapeutic benefit in treating a disease | 2                | 2  | 3  | x  | 2  | 3  | 2.40    |
| Setting reference price (i.e. reimbursement level) at the average price of drugs from the group                                                                                     | 1                | 1  | 2  | 1  | 2  | 2  | 1.50    |
| Setting reference price (i.e. reimbursement level) at the weighted average price of drugs from the group                                                                            | 2                | 3  | 1  | 3  | 3  | 1  | 2.17    |
| Setting reference price (i.e. reimbursement level) at the cheapest drug from the group                                                                                              | 2                | 2  | 1  | 3  | 1  | 3  | 2.00    |
| Setting reference price (i.e. reimbursement level) at the fixed % below the price of the off-patent original drug                                                                   | 3                | 1  | 3  | 3  | 3  | 3  | 2.67    |
| Using ERP to set prices of reimbursable drugs not included into the internal reference price group system                                                                           | 2                | 1  | x  | x  | 2  | 1  | 1.50    |
| Application of free pricing for reimbursable drugs included into the internal reference price group system (with reference price defining the reimbursement level)                  | x                | 1  | x  | x  | 3  | 1  | 2.33    |
| Using ERP to set prices of non-reimbursable drugs                                                                                                                                   | x                | 3  | x  | x  | x  | 1  | 2.00    |
| Application of free pricing for non-reimbursable drugs                                                                                                                              | 1                | 3  | x  | x  | x  | 1  | 1.67    |

21 ERP – external reference pricing; IRP – internal reference pricing, P1...P6 – payer 1 to 6, NA – not applicable, x – no answer

22 1 – Most relevant and applicable to China

23 2 – Quite relevant and applicable to China

24 3 – Not relevant and not applicable to China
